# Supplementary material for: A global seamless 1 km resolution daily land surface temperature dataset (2003–2020)
Source: Copernicus journal article supplement (doi:10.5194/essd-2021-313), 2021-10-12
Supplement: Supplementary file 1 [file essd-2021-313-supplement-version2.pdf]

2 **A global seamless 1 km resolution daily land surface temperature**  
3 **dataset (2003-2020)**

4 **Tao Zhang, Yuyu Zhou, Zhengyuan Zhu, Xiaoma Li, Ghassem R. Asrar**

5 Correspondence to: Yuyu Zhou ([yuyuzhou@iastate.edu](mailto:yuyuzhou@iastate.edu))

6 **S1 Spatial patterns of gap-filled LST between neighboring regions**

7 There are no significant boundary effects between neighboring regions as shown in the example data of gap-filled LST (Fig.  
8 S1), indicating that the division of regions with overlapped areas is useful (Sect. 3.2.2). For example, the spatial pattern of gap-  
9 filled LST based on the proposed gap-filling method has no sudden changes on the boundary of region 1 and region 3 (subregion  
10 A in Fig. S1), and region 2 and region 3 (subregion B in Fig. S1) (Fig. 4). This is because when interpolating the residual of center  
11 blocks near the boundary (Sect. 3.2.2), the valid residual values from the two neighboring regions were used, mitigating boundary  
12 effects in the finally gap-filled LST data.

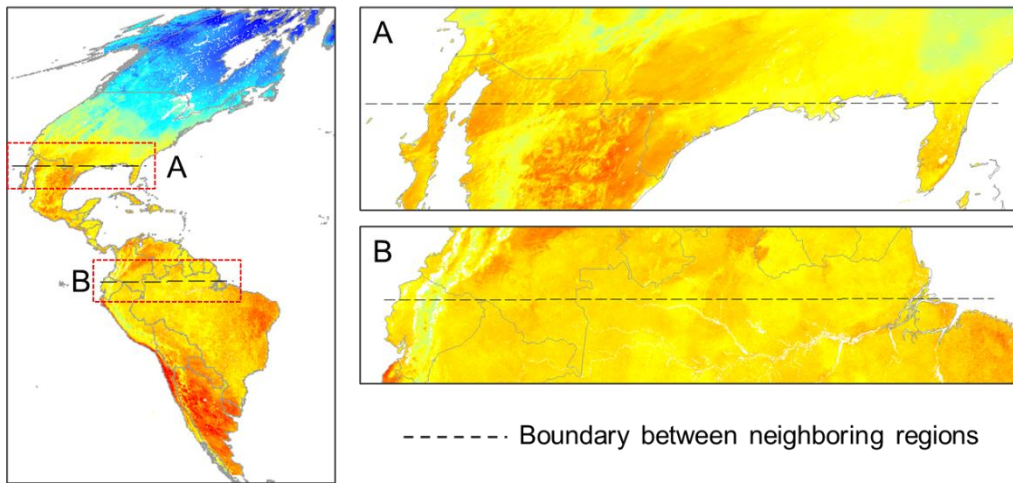

13  
14 **Figure S1: Spatial pattern of gap-filled daytime LST around the boundary of two neighboring regions in America.**

15 **S2 Spatial patterns of the gap-filled LST between neighboring tiles**

16 There are no significant boundary effects between neighboring tiles as shown in the example data of gap-filled LST (Fig. S2),  
17 indicating the interpolation of residuals for block center pixels in a region with multiple tiles is useful (Sect. 3.2.2). There are  
18 obvious boundary effects between tiles h10v04, h11v04, h10v05, and h11v05 (Fig. S2(a)) with these tiles gap-filled independently;  
19 on the contrary, there are no boundary effects when the residuals of the whole region were interpolated at the same time (Fig.  
20 S2(b)). When the residuals for block center pixels were calculated independently for each tile, systematic differences may occur  
21 near the boundary of the two neighboring tiles especially when there are a lot of missing values, leading to boundary effects in the  
22 interpolated residuals and gap-filled LST data.

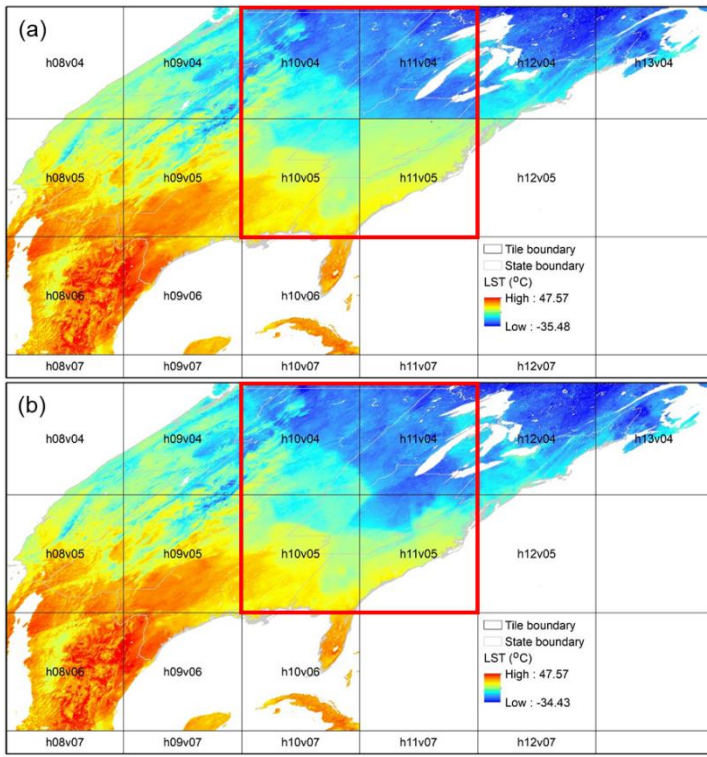

24

25 **Figure S2: Spatial patterns of gap-filled daytime LST without (a) and with (b) interpolating center pixels of multiple tiles on 20th day**  
 26 **of 2012.**

27

28 **Table S1. Average root mean square error (RMSE) (Unit: °C) in excluded area in climate zones**

| Time      | Climate zone           | Landforms                | Original missing rate (%) | RMSE ( $\pm$ standard deviation) |                    |                    |
|-----------|------------------------|--------------------------|---------------------------|----------------------------------|--------------------|--------------------|
|           |                        |                          |                           | 25%                              | 50%                | 75%                |
| Daytime   | Equatorial climate     | Plain, Plateau, Mountain | 24.1                      | 1.97 ( $\pm$ 0.47)               | 1.96 ( $\pm$ 0.42) | 2.03 ( $\pm$ 0.43) |
|           | Arid climate           | Desert, Plateau, Basin   | 1.3                       | 1.40 ( $\pm$ 0.51)               | 1.42 ( $\pm$ 0.48) | 1.64 ( $\pm$ 0.53) |
|           | Warm temperate climate | Plain, Plateau           | 13.7                      | 1.81 ( $\pm$ 0.50)               | 1.79 ( $\pm$ 0.46) | 2.05 ( $\pm$ 0.59) |
|           | Snow climate           | Plain, Mountain          | 16.2                      | 2.17 ( $\pm$ 0.66)               | 2.25 ( $\pm$ 0.68) | 2.50 ( $\pm$ 0.74) |
|           | Polar climate          | Plateau of Tibet         | 10.7                      | 2.71 ( $\pm$ 0.77)               | 2.73 ( $\pm$ 0.77) | 2.87 ( $\pm$ 0.72) |
| Nighttime | Equatorial climate     | Plain, Plateau, Mountain | 23.0                      | 1.24 ( $\pm$ 0.35)               | 1.21 ( $\pm$ 0.30) | 1.33 ( $\pm$ 0.33) |
|           | Arid climate           | Desert, Plateau, Basin   | 2.0                       | 1.03 ( $\pm$ 0.30)               | 1.19 ( $\pm$ 0.35) | 1.30 ( $\pm$ 0.41) |
|           | Warm temperate climate | Plain, Plateau           | 10.5                      | 1.11 ( $\pm$ 0.27)               | 1.23 ( $\pm$ 0.32) | 1.40 ( $\pm$ 0.42) |
|           | Snow climate           | Plain, Mountain          | 13.1                      | 1.80 ( $\pm$ 0.57)               | 1.81 ( $\pm$ 0.64) | 1.97 ( $\pm$ 0.64) |
|           | Polar climate          | Plateau of Tibet         | 2.2                       | 1.50 ( $\pm$ 0.28)               | 1.60 ( $\pm$ 0.29) | 1.62 ( $\pm$ 0.24) |

29 Note: Each root mean square error (RMSE) is the mean of RMSEs from all selected days in selected MODIS tiles of a specific climate zone  
 30 (from 15 MODIS tiles).

31

32

33

34

35

36

37 **Table S2. Summary of existing seamless LST dataset at large spatial extent**

| Literature                       | Spatial extent                             | Spatial resolution                 | Temporal frequency                          | Coverage time | Accuracy (default: RMSE)     |
|----------------------------------|--------------------------------------------|------------------------------------|---------------------------------------------|---------------|------------------------------|
| Metz et al. (2017)               | Global                                     | 3 arc-min (~5.6 km at the equator) | Monthly                                     | 2003 – 2016   | 0.5K                         |
| Li et al. (2018)                 | United States, urban and surrounding areas | 1 km                               | Daily (mid-daytime and mid-nighttime)       | 2010          | 3.29°C (day), 2.68°C (night) |
| Zhao et al. (2020)               | China                                      | 1 km                               | Monthly                                     | 2003 – 2017   | 1.59°C                       |
| Cheng et al. (2021)              | China                                      | 1 km                               | Daily (mid-daytime and mid-nighttime)       | 2002 – 2020   | 3K                           |
| Zhang et al. (2021b)             | China and surrounding areas                | 1 km                               | Daily, all weather                          | 2000 – 2020   | 2.03K to 3.98K               |
| Zhan et al. (2021)               | Global                                     | 1 km                               | Daily, Average                              | 2003 – 2019   | Mean absolute error is 1.0K  |
| Shiff et al. (2021)              | Global (need to run code on GEE)           | 1 km                               | Daily (mean, mid-daytime and mid-nighttime) | 2002 – 2020   | 2.7°C (mean)                 |
| This study (Zhang et al., 2021a) | Global                                     | 1 km                               | Daily (mid-daytime and mid-nighttime)       | 2003 – 2020   | 1.83°C (day), 1.28°C (night) |

38

39 **Reference**

40 Cheng, J., Dong, S. and Shi, J.: 1km seamless land surface temperature dataset of China (2002-2020), edited by N. T. P. D.  
41 Center, Natl. Tibet. Plateau Data Cent., doi:10.11888/Meteoro.tpd.c.271657, 2021.

42 Li, X., Zhou, Y., Asrar, G. R. and Zhu, Z.: Creating a seamless 1 km resolution daily land surface temperature dataset for urban  
43 and surrounding areas in the conterminous United States, *Remote Sens. Environ.*, 206, 84–97, doi:10.1016/j.rse.2017.12.010,  
44 2018.

45 Metz, M., Andreo, V. and Neteler, M.: A New Fully Gap-Free Time Series of Land Surface Temperature from MODIS LST  
46 Data, *Remote Sens.*, 9(12), 1333, doi:10.3390/rs9121333, 2017.

47 Shiff, S., Helman, D. and Lensky, I. M.: Worldwide continuous gap-filled MODIS land surface temperature dataset, *Sci. Data*,  
48 8(1), 1–10, doi:10.1038/s41597-021-00861-7, 2021.

49 Zhan, W., Hong, F. and Chen, Y.: Global daily average 1km resolution land surface temperature dataset from 2003 to  
50 2019[DB/OL], *Chinese Ecosyst. Sci. Data Cent.*, doi:10.12199/nesdc.ecodb.2016YFA0600200.01.005, 2021.

51 Zhang, T., Zhou, Y., Zhu, Z., Li, X. and Asrar, G. R.: A global seamless 1 km resolution daily land surface temperature dataset  
52 (2003 – 2020), *Iowa State Univ.*, doi:10.25380/iastate.c.5078492, 2021a.

53 Zhang, X., Zhou, J., Tang, W., Ding, L., Ma, J. and Zhang, X.: Daily 1-km all-weather land surface temperature dataset for the  
54 Chinese landmass and its surrounding areas (TRIMS LST; 2000-2020), edited by N. T. P. D. Center, Natl. Tibet. Plateau Data  
55 Cent., doi:10.11888/Meteoro.tpd.c.271252, 2021b.

56 Zhao, B., Mao, K., Cai, Y., Shi, J., Li, Z., Qin, Z., Meng, X., Shen, X. and Guo, Z.: A combined Terra and Aqua MODIS land  
57 surface temperature and meteorological station data product for China from 2003 to 2017, *Earth Syst. Sci. Data*, 12(4), 2555–  
58 2577, doi:10.5194/essd-12-2555-2020, 2020.

59
