# Supplementary material for: A global seamless 1 km resolution daily land surface temperature dataset (2003–2020)
Source: Copernicus journal article supplement (doi:10.5194/essd-2021-313), 2021-10-12
Supplement: Supplementary file 2 [file essd-2021-313-supplement.zip]

Archive with 2 entries (2 files):
- gapfilling_lst_supplement_submit.pdf
- PeerReviewLinks.csv
