# Supplementary material for: A global seamless 1 km resolution daily land surface temperature dataset (2003–2020)
Source: Copernicus journal article supplement (doi:10.5194/essd-2021-313), 2021-10-12
Supplement: Supplementary file 2 [file essd-2021-313-supplement.zip › PeerReviewLinks.csv]

YEAR	TIME	Peer Review (private) LINK
2020	Nit	https://figshare.com/s/748c89d6f97d0c09a2d6
2020	Day	https://figshare.com/s/07ae26bccae53e1013e0
2019	Nit	https://figshare.com/s/d034277d33a6e5349dd5
2019	Day	https://figshare.com/s/f09299ee7294e52f49bd
2018	Nit	https://figshare.com/s/24d8772b0effd2028156
2018	Day	https://figshare.com/s/9965a9a0320025d1c9ec
2017	Nit	https://figshare.com/s/b3f76140a649a534d475
2017	Day	https://figshare.com/s/1311362e5bb812afb2dc
2016	Nit	https://figshare.com/s/e94523be4b32c900f7a1
2016	Day	https://figshare.com/s/80443a546ba30dee51f9
2015	Nit	https://figshare.com/s/d83371fd443b7d61f049
2015	Day	https://figshare.com/s/cbc485c6c5ad2770c9f0
2014	Nit	https://figshare.com/s/7bba2beb08bf33db185c
2014	Day	https://figshare.com/s/08342ce1c4d76d031430
2013	Nit	https://figshare.com/s/3ea79d39ea8f82c29ff5
2013	Day	https://figshare.com/s/c4f8852ebad8f627ca71
2012	Nit	https://figshare.com/s/859983ad973a190a7c6a
2012	Day	https://figshare.com/s/981892ce9efe27fc4cdc
2011	Nit	https://figshare.com/s/e8f91227276ff55c9577
2011	Day	https://figshare.com/s/b6e7bcfa7fd891d8cf38
2010	Nit	https://figshare.com/s/c42ea52f813769898763
2010	Day	https://figshare.com/s/d812486de42d4d4e6f3c
2009	Nit	https://figshare.com/s/505cf9bb4631db0bb5ed
2009	Day	https://figshare.com/s/47f7ea45214ffa75a356
2008	Nit	https://figshare.com/s/70fc51d70d2e2c71f0a1
2008	Day	https://figshare.com/s/03f87e8a119178a3611f
2007	Nit	https://figshare.com/s/626b4c33f9533a0e0ea8
2007	Day	https://figshare.com/s/c170b635740205dd1f83
2006	Nit	https://figshare.com/s/d947fd8d5067bba27ec3
2006	Day	https://figshare.com/s/bc5d3ec2515b2593bd67
2005	Nit	https://figshare.com/s/5e074ef87e0cd297cf52
2005	Day	https://figshare.com/s/cec8d85b61b827a62bcd
2004	Nit	https://figshare.com/s/b28a47afd6700b8c8faf
2004	Day	https://figshare.com/s/d5f466042191917a74b6
2003	Nit	https://figshare.com/s/be9c9f93c8b62105ea39
2003	Day	https://figshare.com/s/2de90ea6de9b642f2a7a
